# Supplementary material
Source: PubMed Central journal article supplement (PMC7336504)
Supplement: NIHMS1591351-supplement-1.pdf [file NIHMS1591351-supplement-1.pdf]

Figure S1

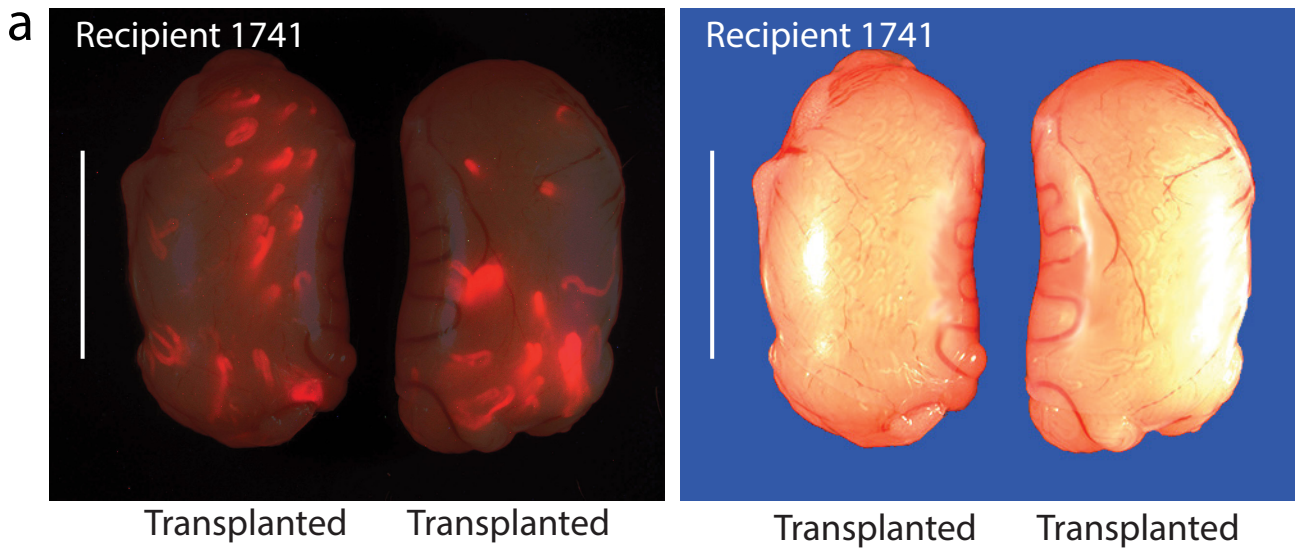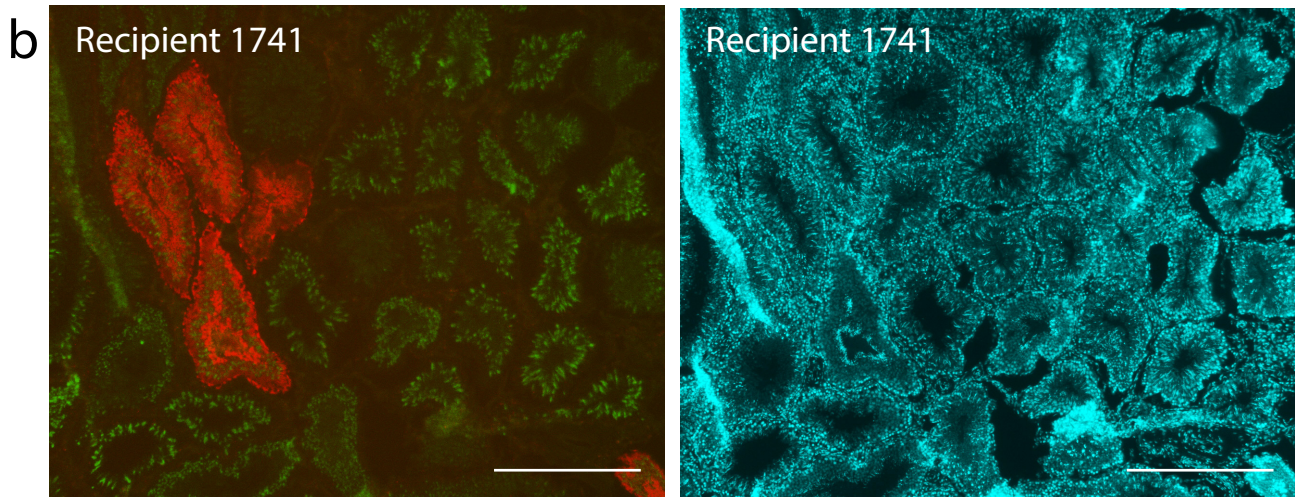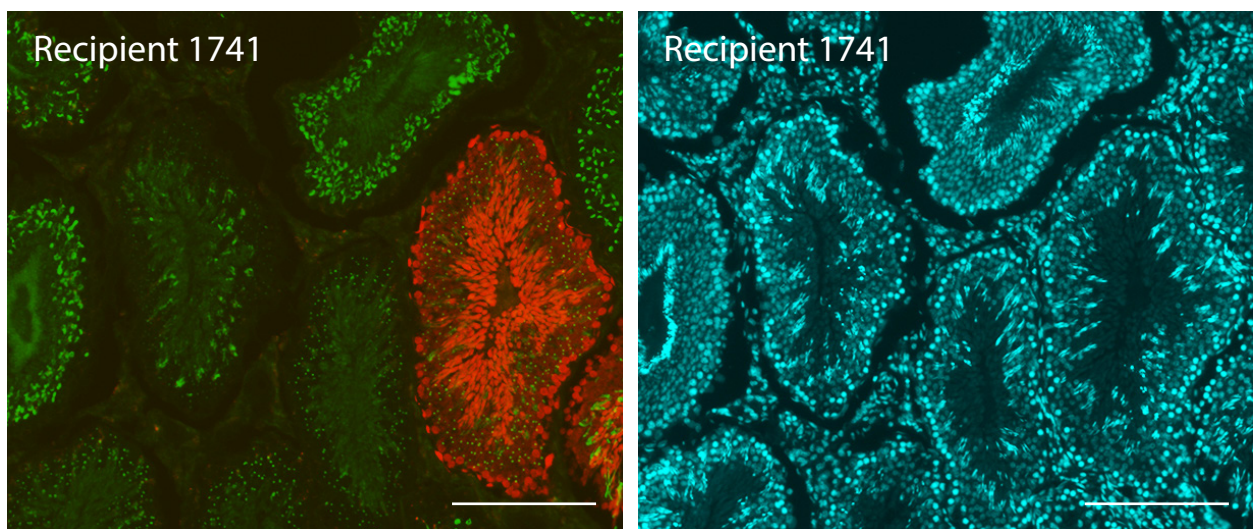

 dtTOMATO

 PNA Lectin

 Hoechst 33342

### **Supplementary Figure S1. Donor derived spermatogenesis in allogenic, recipient Long Evans rats**

**a)** Testes from Long Evans recipient rat 1741 ~8 mo after being transplanted with a Long Evans rat spermatogonial line at passage 5 following genetic modification with pSB*dtDazl*-tdTomato (donor spermatogonia population contained ~14.5% tdTomato<sup>+</sup> cells). Note: Red, tdTomato<sup>+</sup> seminiferous tubules. Scale, 1 cm.

**b)** Additional microscopic fields demonstrating donor derived spermatogenesis in representative testis sections prepared from Recipient 1741 at ~8 mo post-transplantation. Note, development of tdTomato<sup>+</sup> spermatids (Red, cytoplasmic germ cell marker) co-labeled with Hoeschet 33342 (Cyan, nuclear marker; *left panel*) and PNA (Green, acrosome marker; *right panel*). Also note, full spermatogenesis in seminiferous tubules colonized with tdTomato<sup>-</sup> cells. Scale 200 μm.
